# Supplementary material for: Shape-controlled synthesis of nanopyramids and nanoprisms of nickel sulfide (Ni3S4)
Source: Royal Society of Chemistry journal article supplement (doi:10.1039/c4nr01196a), 2014-01-01
Supplement: c4nr01196a3.pdf [file c4nr01196a3.pdf]

## †Electronic Supplementary Information (ESI)

# Shape-Controlled Synthesis of Nanopyramids and Nanoprisms of Nickel Sulfide ( $\text{Ni}_3\text{S}_4$ )

*Qingsheng Liu*<sup>a, b†</sup>, *Agustín Díaz*,<sup>a†</sup> *Andrey Prosvirin*,<sup>a</sup> *Zhiping Luo*<sup>c, d</sup>

and *James D. Batteas*<sup>\*a</sup>

a) Department of Chemistry, Texas A&M University, PO Box 30012,  
College Station, TX 77842, USA

b) Department of Chemistry and Biochemistry, James Madison University,  
Harrisonburg, VA 22802, USA

c) Microscopy and Imaging Center, Texas A&M University, College Station, TX 77843, USA

d) Department of Chemistry and Physics, Fayetteville State University,  
Fayetteville, NC 28301

\* Corresponding author

† These authors contributed equally to this work.

e-mail: [batteas@chem.tamu.edu](mailto:batteas@chem.tamu.edu)

### Table of contents:

**Page S2-** Supporting Fig. S1: TEM image of the  $\text{Ni}_3\text{S}_4$  nanoprisms showing a large area and the self-assembly of the nanoparticles on the TEM grid.

**Page S3-** Supporting Fig. S2: TEM image of the  $\text{Ni}_3\text{S}_4$  nanopyramids showing a large area and the self-assembly of the nanoparticles on the TEM grid.

**Page S4-** Supporting Fig.S 3: UV-vis absorbance spectra of the Ni complexes formed in the presence of the capping ligands and dodecanethiol for (a)  $\text{NiCl}_2 \cdot \text{H}_2\text{O}$  and (b)  $\text{Ni}(\text{acac})_2$  in 1-octadecene at 120 °C.

**Page S5-** Table SI-1. Reaction conditions to obtain  $\text{Ni}_3\text{S}_4$  nanopyramids in high yields.

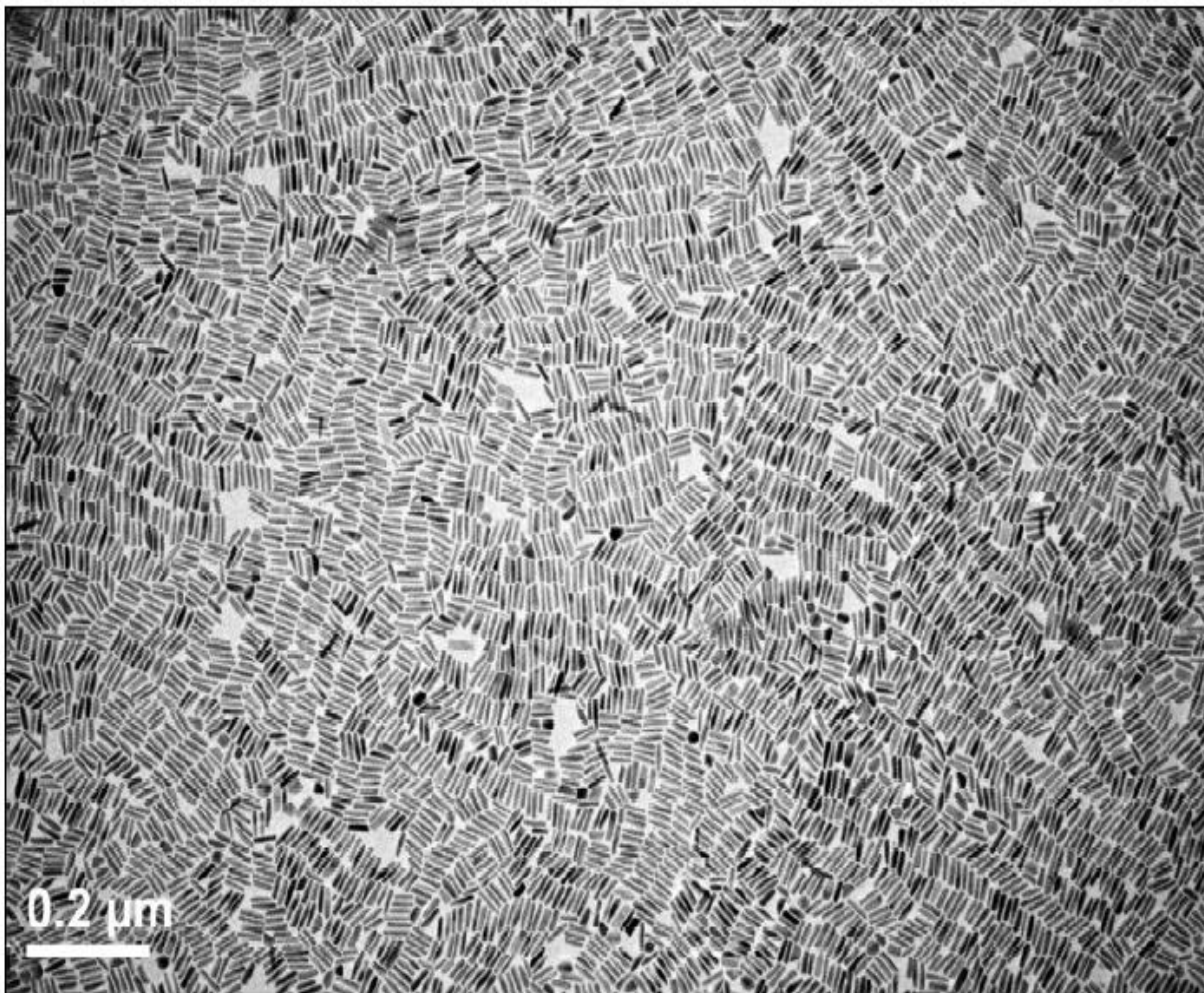

**Fig. S1:** TEM image of the Ni<sub>3</sub>S<sub>4</sub> nanoprisms showing a large area and the self-assembly of the nanoparticles on the TEM grid.

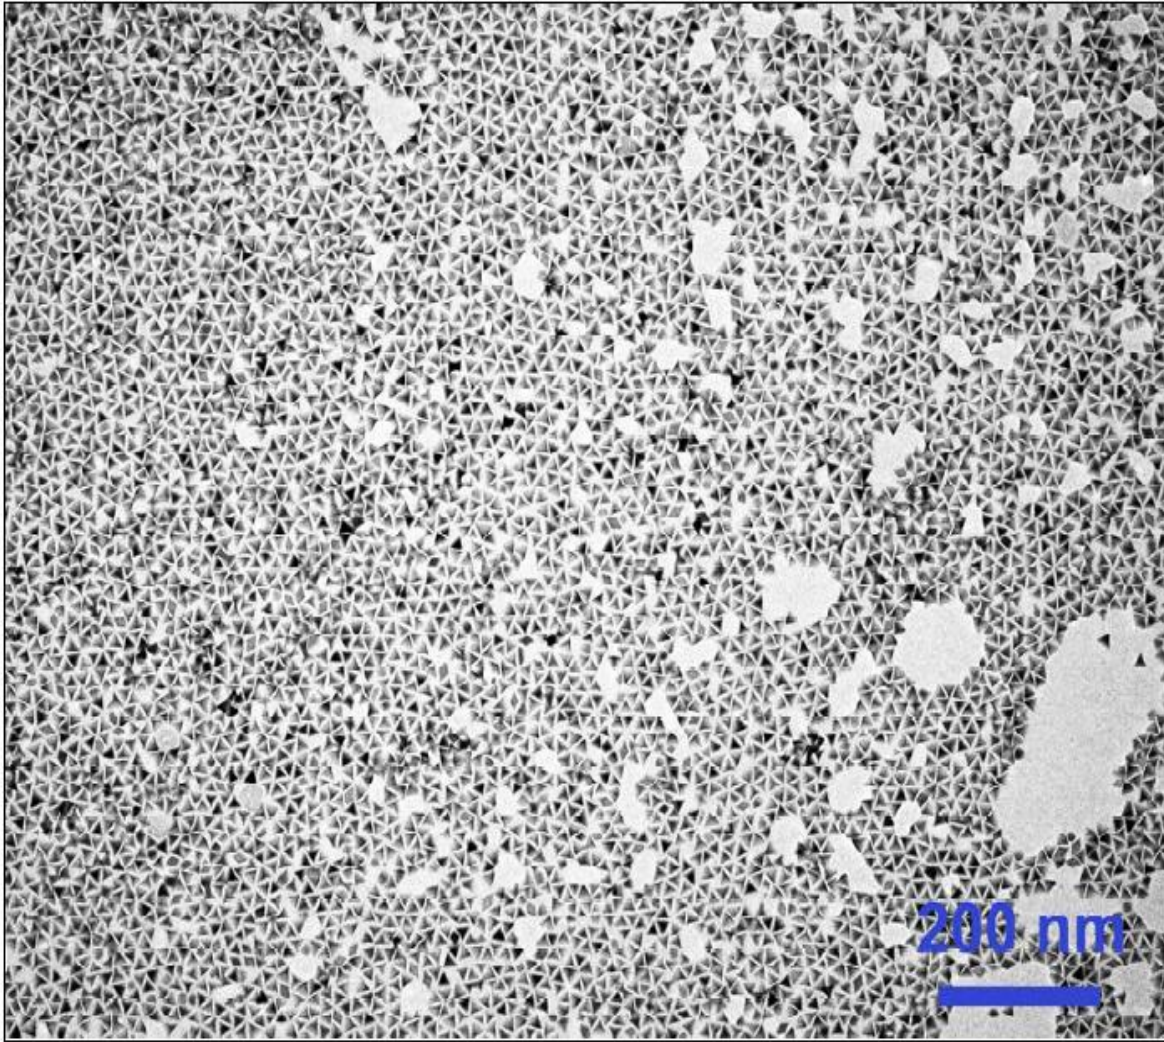

**Fig. S2:** TEM image of the Ni<sub>3</sub>S<sub>4</sub> nanopryramids showing a large area and the self-assembly of the nanoparticles on the TEM grid.

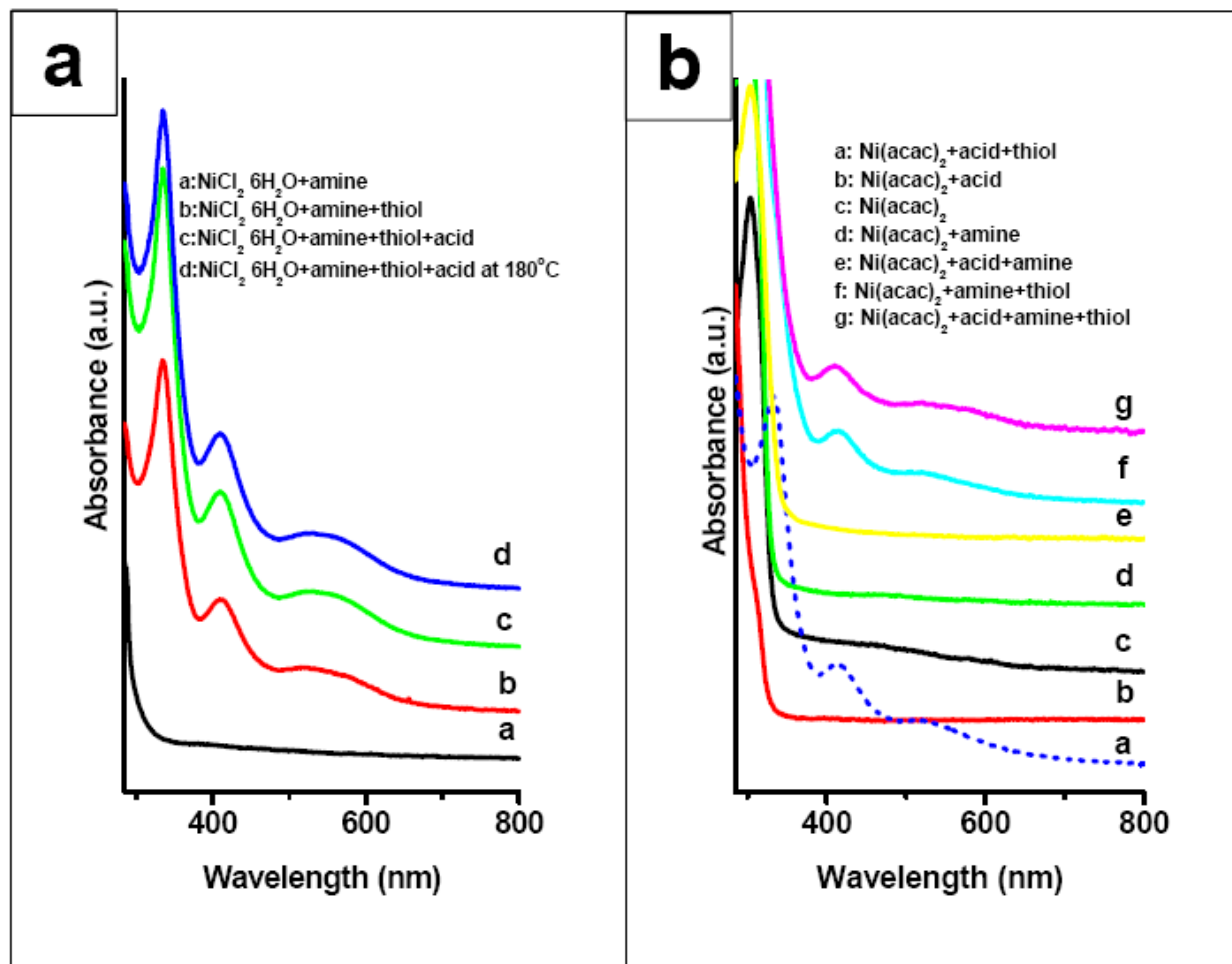

**Fig. S3:** UV-vis absorbance spectra of the Ni complexes formed in the presence of the capping ligands and dodecanethiol for (a)  $\text{NiCl}_2 \cdot \text{H}_2\text{O}$  and (b)  $\text{Ni}(\text{acac})_2$  in 1-octadecene at  $120^\circ\text{C}$ .

**Table S1.** Reaction conditions to obtain Ni<sub>3</sub>S<sub>4</sub> nanopyramids in high yields.

| Sample | OLM <sup>a</sup><br>(mL) | OLA <sup>b</sup><br>(mL) | DDT <sup>c</sup><br>( $\mu$ L) | Solvent* | Edge<br>Length(nm) | Yield | Time   | Comments     |
|--------|--------------------------|--------------------------|--------------------------------|----------|--------------------|-------|--------|--------------|
| 1      | 0.8                      | 0                        | 120                            | BE       | ~10/5              | Low   | 2 min  |              |
| 2      | 1.2                      | 0                        | 450                            | BE       | ~50-70             | Low   | 5 min  | Mixed shapes |
| 3      | 1.2                      | 0                        | 450                            | BE       | ~200               | Low   | 35 min |              |
| 4      | 0.4                      | 0.2                      | 450                            | ODE      | 15.5               | Low   | 2 min  |              |
| 5      | 0.4                      | 0.2                      | 450                            | BE       | 8.1                | Low   | 5 min  |              |
| 6      | 0.6                      | 0.2                      | 450                            | ODE      | 16                 | High  | 2 min  |              |
| 7      | 0.8                      | 0.2                      | 450                            | ODE      | ~16                | High  | 2 min  | Mixed shapes |
| 8      | 0.8                      | 0.2                      | 450                            | BE       | 14.7               |       | 5 min  |              |
| 9      | 0                        | 0.6                      | 450                            | ODE      | 17.2/6.5           |       | 5 min  | Nanobars     |
| 10     | 0.4                      | 0.6                      | 450                            | BE       | 9.1                | Low   | 5 min  |              |
| 11     | 0.6                      | 0.6                      | 450                            | ODE      | 19.2               | High  | 5 min  |              |
| 12     | 0.8                      | 0.6                      | 450                            | BE       | ~15                |       | 5 min  | Mixed shapes |
| 13     | 1.2                      | 0.6                      | 450                            | BE       | ~16                |       | 5 min  | Mixed shapes |

a: oleylamine volume; b: oleic acid volume; c: 1-dodecanethiol volume.

\*All the reactions were carried out in 5 mL of solvent (ODE = 1-octadecene, BE = benzyl ether) in the presence of 120 mg of Ni(acac)<sub>2</sub>.
